# Supplementary material
Source: PubMed Central journal article supplement (PMC507885)
Supplement: gb-2004-5-8-r60-s1.pdf [file gb-2004-5-8-r60-s1.pdf]

# ADDITIONAL MATERIAL

Figures:

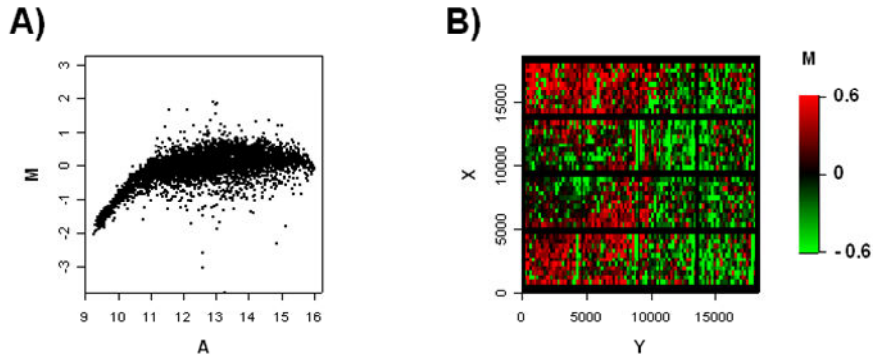

**Figure 1:** Intensity and spatial distribution of log intensity ratios  $M$  adjusted by linear normalization for slide 3 of the SW 480/620 experiment. Patterns of intensity-dependent and spatial bias remain clearly visible.

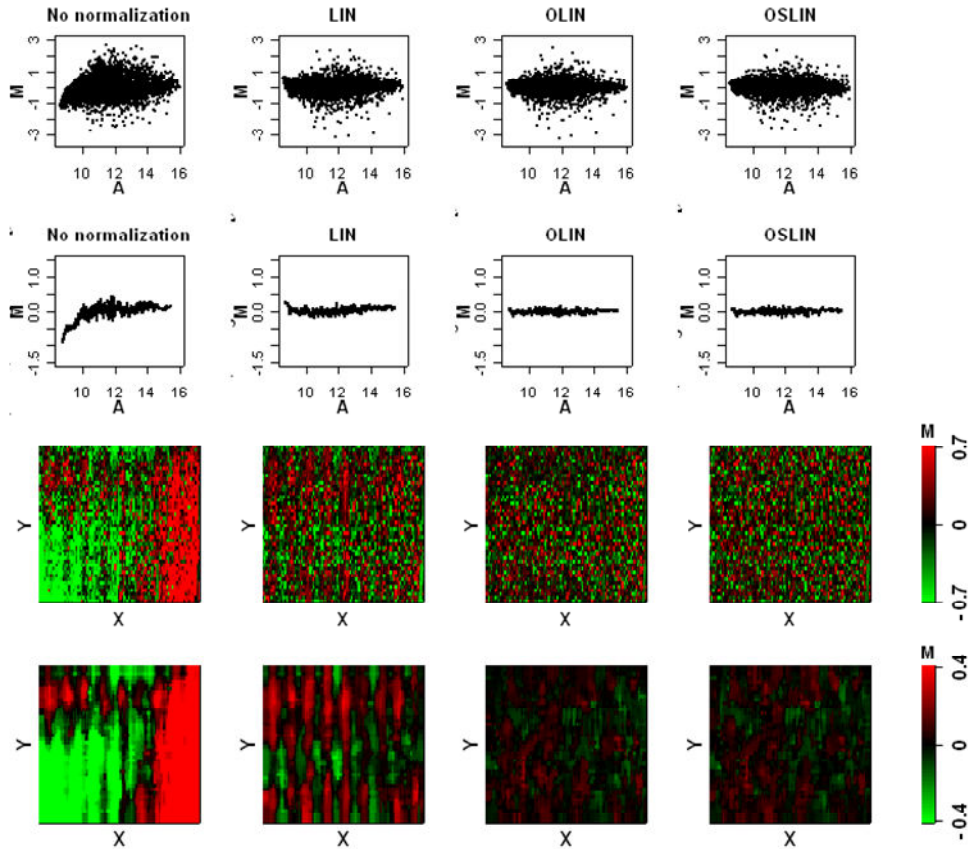

**Figure 2:** MA-,  $\overline{MA}$ -, MXY- and  $\overline{MXY}$ -plots for slide 1 of the SW 480/620 experiment: The first row shows MA-plots resulting from different normalization schemes applied. The second row displays the corresponding  $\overline{MA}$ -plots. The median log ratio  $\overline{M}$  was calculated based on a window size of 50 spots. The third row shows MXY-plots. The fourth row shows  $\overline{MXY}$ -plots. Median log ratio  $\overline{M}$  was calculated based on windows of 5x5 spots. Spatial artifacts become more prominent in  $\overline{MXY}$ -plots.

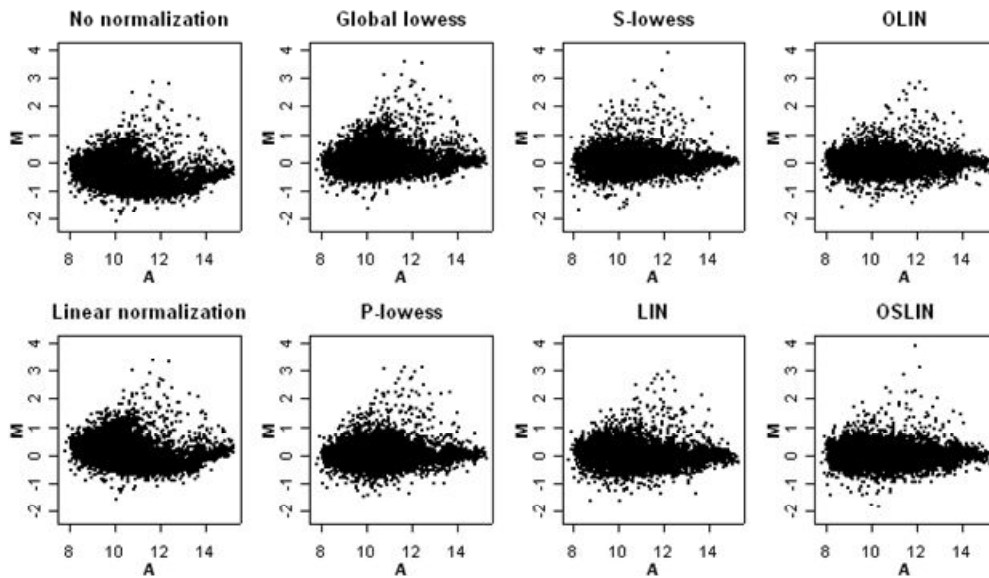

**Figure 3:** MA-plots for raw data from slide 1 of the *apo AI* experiment and the same data normalized by different methods.

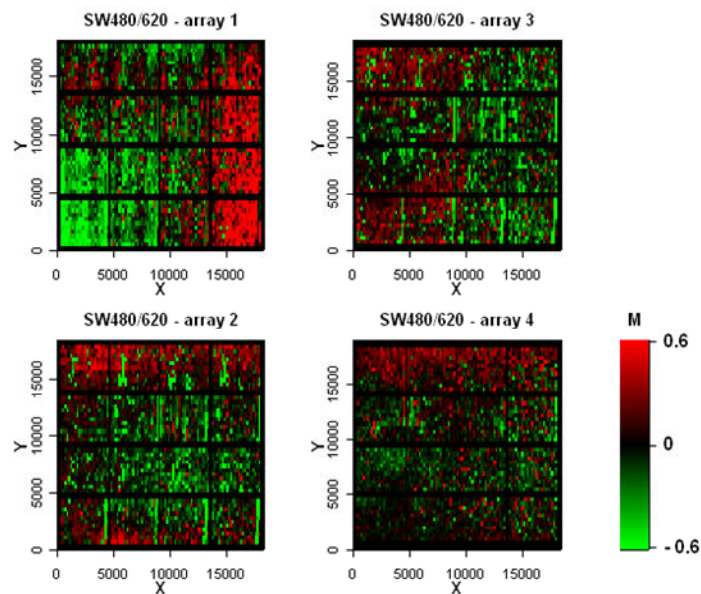

**Figure 4:** MXY-plots of linearly normalized data for replicated slides of SW 480/620. Each slide shows a distinct spatial pattern.

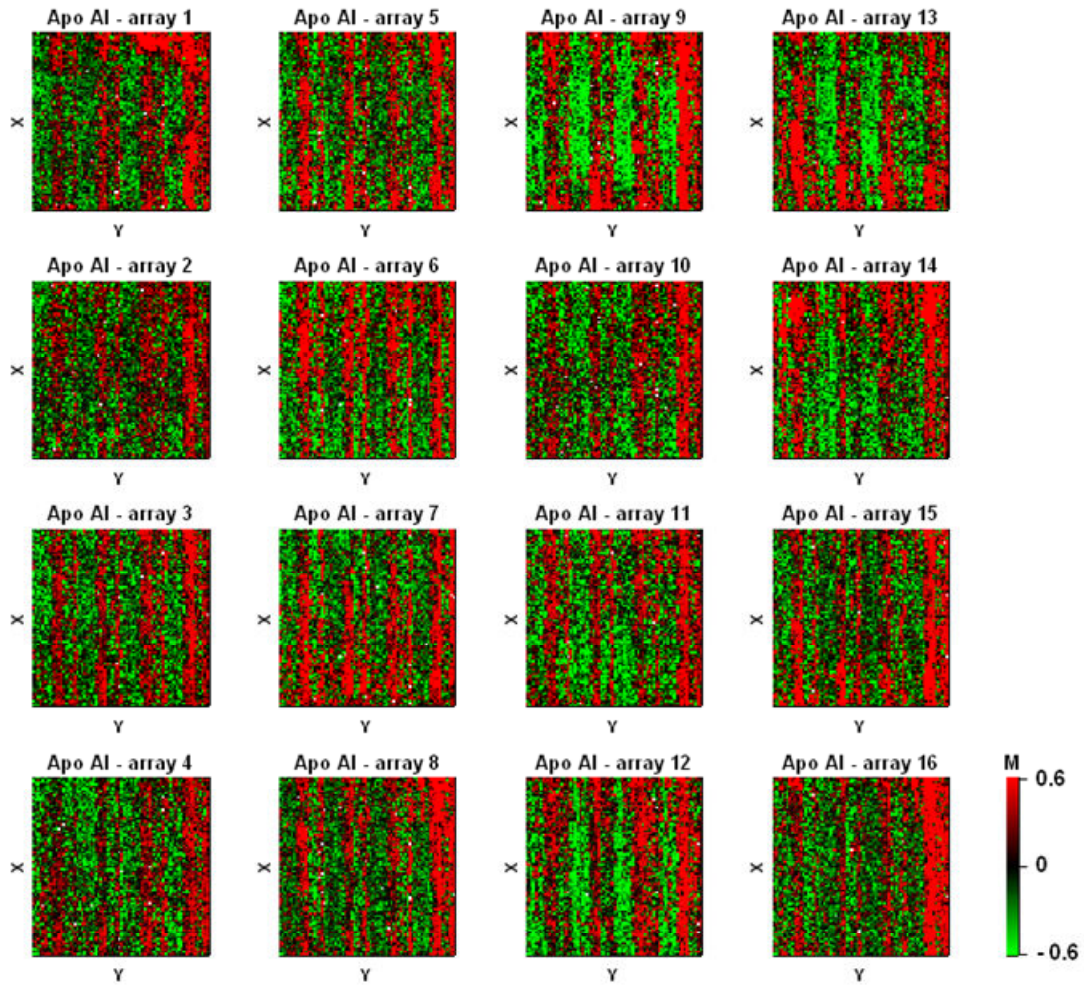

**Figure 5:** MXY-plots of linearly normalized data for slides of the *apo AI* experiment. Plots display similar spatial patterns.

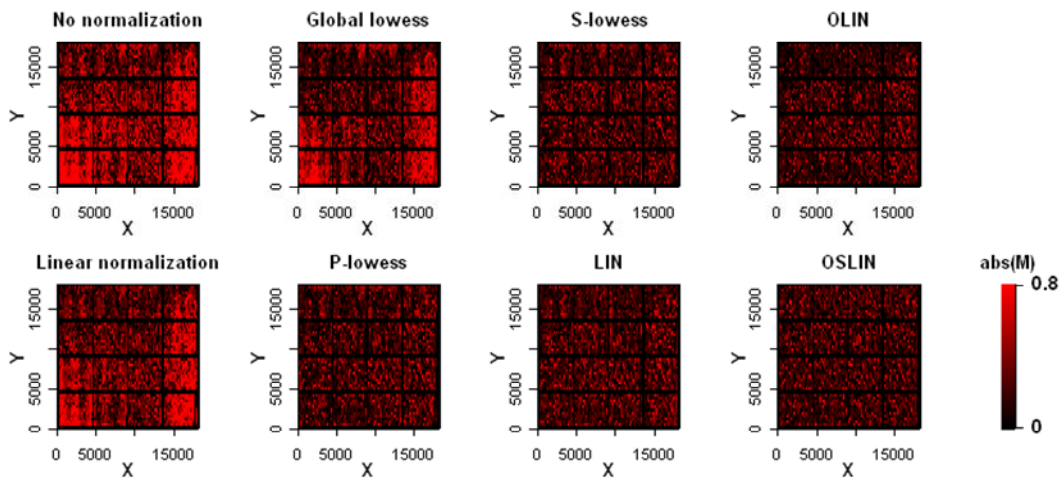

**Figure 6:** Spatial distribution of absolute log ratios for slide 1 of the SW 480/620 experiment.

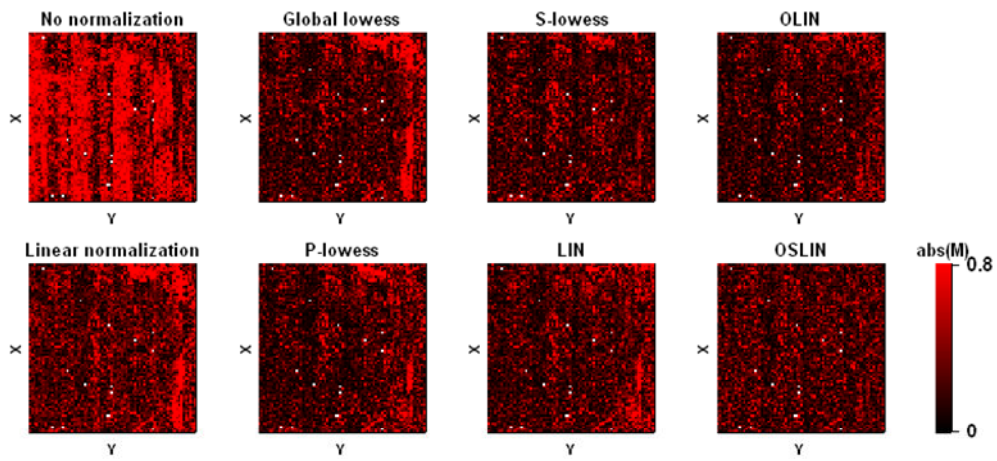

**Figure 7:** Spatial distribution of absolute log ratios for slide 1 of the *apo AI* experiment.



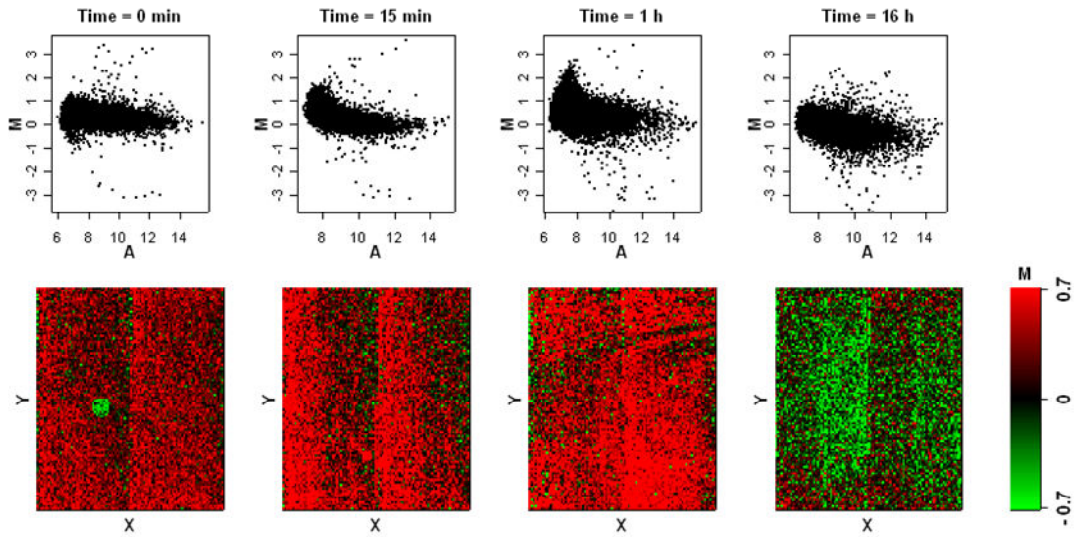

**Figure 8:** MA and MXY plots for raw data of several cDNA microarray of the fibrosis experiment by Iyer and colleagues [20]. The times refer to the time points when the cultured fibroblasts were harvested after stimulation by fetal bovine serum.

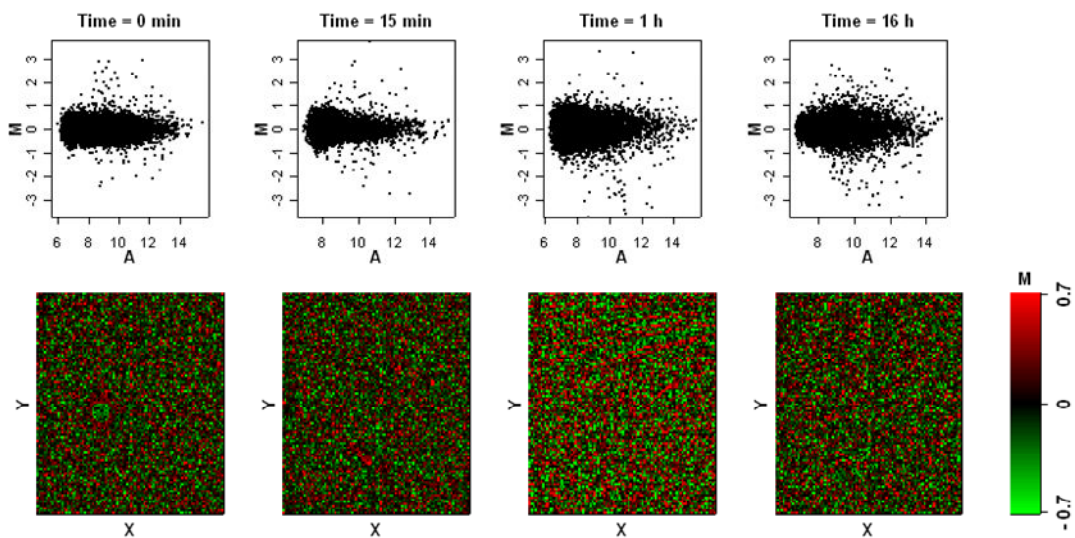

**Figure 9:** MA and MXY plots of data normalized by OSLIN for the same microarrays as in figure 8.

**Tables:**

|        | <i>No norm.</i> | <i>Linear norm.</i> | <i>Global lowess</i> | <i>P-lowess</i> | <i>S-lowess</i> | <i>LIN</i> | <i>OLIN</i> | <i>OSLIN</i> |
|--------|-----------------|---------------------|----------------------|-----------------|-----------------|------------|-------------|--------------|
| SW 1   | 614             | 801                 | 787                  | 0               | 3               | 0          | 0           | 0            |
| SW 2   | 756             | 267                 | 213                  | 15              | 0               | 0          | 0           | 0            |
| SW 3   | 237             | 48                  | 75                   | 9               | 4               | 25         | 25          | 0            |
| SW4    | 358             | 190                 | 188                  | 0               | 0               | 0          | 1           | 0            |
| Apo 1  | 377             | 486                 | 489                  | 387             | 0               | 0          | 0           | 0            |
| Apo 2  | 230             | 349                 | 311                  | 50              | 0               | 0          | 0           | 0            |
| Apo 3  | 475             | 342                 | 337                  | 15              | 0               | 0          | 0           | 0            |
| Apo 4  | 78              | 227                 | 241                  | 5               | 0               | 0          | 0           | 0            |
| Apo 5  | 149             | 269                 | 269                  | 44              | 0               | 0          | 0           | 0            |
| Apo 6  | 214             | 2302                | 305                  | 41              | 0               | 0          | 0           | 0            |
| Apo 7  | 474             | 106                 | 100                  | 98              | 0               | 0          | 0           | 2            |
| Apo 8  | 157             | 562                 | 564                  | 431             | 0               | 28         | 28          | 4            |
| Apo 9  | 658             | 590                 | 595                  | 461             | 8               | 0          | 0           | 0            |
| Apo 10 | 2               | 2523                | 268                  | 0               | 0               | 0          | 0           | 0            |
| Apo 11 | 54              | 397                 | 394                  | 0               | 0               | 0          | 0           | 0            |
| Apo 12 | 475             | 272                 | 269                  | 61              | 0               | 0          | 0           | 0            |
| Apo 13 | 253             | 336                 | 336                  | 294             | 0               | 0          | 0           | 0            |
| Apo 14 | 200             | 309                 | 316                  | 129             | 0               | 0          | 0           | 0            |
| Apo 15 | 142             | 443                 | 447                  | 277             | 0               | 6          | 0           | 0            |
| Apo 16 | 58              | 676                 | 670                  | 497             | 0               | 2          | 0           | 0            |

**Table 1:** Number of spot location neighborhoods with significantly extreme average value of  $abs(M)$ . The level of significance was defined by FDR=0.01. The spot neighborhood was defined by a window of 5x5 spots.

| <i>Array</i> | <i>No norm.</i> | <i>Linear norm.</i> | <i>Global lowess</i> | <i>P-lowess</i> | <i>S-lowess</i> | <i>LIN</i> | <i>OLIN</i> | <i>OSLIN</i> |
|--------------|-----------------|---------------------|----------------------|-----------------|-----------------|------------|-------------|--------------|
| SW 1         | 0.33            | 0.33                | 0.02                 | 0.01            | 0.01            | 0.09       | 0.01        | 0.01         |
| SW 2         | 0.68            | 0.68                | 0.03                 | -0.01           | -0.01           | 0.05       | -0.00       | 0.01         |
| SW 3         | 0.66            | 0.66                | 0.02                 | -0.01           | -0.00           | 0.04       | -0.02       | -0.01        |
| SW4          | 0.35            | 0.35                | -0.02                | -0.02           | -0.02           | 0.01       | -0.00       | -0.01        |
| Apo 1        | 0.29            | 0.29                | 0.00                 | 0.02            | 0.01            | 0.06       | 0.01        | 0.02         |
| Apo 2        | 0.45            | 0.45                | 0.03                 | 0.03            | 0.02            | 0.08       | -0.03       | -0.02        |
| Apo 3        | 0.62            | 0.62                | 0.06                 | 0.07            | 0.07            | 0.06       | 0.03        | 0.02         |
| Apo 4        | 0.42            | 0.42                | 0.04                 | 0.06            | 0.07            | 0.06       | 0.02        | 0.01         |
| Apo 5        | 0.58            | 0.58                | 0.07                 | 0.06            | 0.06            | 0.06       | 0.02        | 0.01         |
| Apo 6        | 0.72            | 0.72                | 0.08                 | 0.07            | 0.06            | 0.011      | 0.02        | -0.02        |
| Apo 7        | 0.67            | 0.67                | 0.09                 | 0.03            | 0.07            | 0.05       | -0.01       | 0.01         |
| Apo 8        | 0.45            | 0.45                | 0.12                 | 0.03            | 0.04            | 0.15       | -0.02       | 0.00         |
| Apo 9        | 0.26            | 0.26                | 0.01                 | 0.04            | 0.045           | 0.18       | 0.01        | 0.01         |
| Apo 10       | 0.40            | 0.40                | 0.04                 | 0.07            | 0.04            | 0.09       | -0.01       | -0.01        |
| Apo 11       | 0.54            | 0.54                | 0.03                 | 0.04            | 0.07            | 0.07       | 0.00        | -0.02        |
| Apo 12       | 0.60            | 0.60                | 0.02                 | 0.01            | 0.04            | 0.08       | -0.01       | 0.03         |
| Apo 13       | 0.42            | 0.42                | 0.05                 | 0.01            | 0.01            | 0.06       | -0.01       | 0.03         |
| Apo 14       | 0.40            | 0.40                | 0.07                 | 0.07            | 0.07            | 0.10       | 0.01        | 0.01         |
| Apo 15       | 0.47            | 0.47                | 0.09                 | 0.04            | 0.03            | 0.07       | 0.01        | 0.01         |
| Apo 16       | 0.22            | 0.22                | 0.16                 | 0.04            | 0.03            | 0.17       | 0.01        | 0.04         |

**Table 2:** Intensity-dependent correlation describes the correlation between the log ratio  $M$  of the spot and the median value of  $M$  within a symmetrical neighborhood of 50 spots on the intensity scale. To ensure independence,  $M$  of the spot was not included in the median  $M$  of the neighborhood.

|        | <i>No norm.</i> | <i>Linear norm.</i> | <i>Global lowess</i> | <i>P-Lowess</i> | <i>S-Lowess</i> | <i>LIN</i> | <i>OLIN</i> | <i>OSLIN</i> |
|--------|-----------------|---------------------|----------------------|-----------------|-----------------|------------|-------------|--------------|
| SW 1   | 0.72            | 0.72                | 0.75                 | 0.43            | 0.43            | 0.37       | 0.02        | 0.03         |
| SW 2   | 0.47            | 0.47                | 0.55                 | 0.36            | 0.31            | 0.25       | 0.09        | 0.10         |
| SW 3   | 0.43            | 0.43                | 0.44                 | 0.31            | 0.30            | 0.27       | 0.09        | 0.10         |
| SW4    | 0.46            | 0.46                | 0.46                 | 0.25            | 0.23            | 0.19       | 0.08        | 0.10         |
| Apo 1  | 0.65            | 0.65                | 0.65                 | 0.53            | 0.46            | 0.49       | 0.14        | 0.16         |
| Apo 2  | 0.50            | 0.50                | 0.50                 | 0.34            | 0.32            | 0.39       | 0.16        | 0.16         |
| Apo 3  | 0.56            | 0.56                | 0.54                 | 0.38            | 0.35            | 0.40       | 0.20        | 0.21         |
| Apo 4  | 0.49            | 0.49                | 0.53                 | 0.33            | 0.31            | 0.34       | 0.14        | 0.13         |
| Apo 5  | 0.57            | 0.57                | 0.57                 | 0.42            | 0.40            | 0.43       | 0.14        | 0.14         |
| Apo 6  | 0.53            | 0.53                | 0.60                 | 0.39            | 0.37            | 0.43       | 0.17        | 0.17         |
| Apo 7  | 0.53            | 0.53                | 0.56                 | 0.39            | 0.38            | 0.41       | 0.18        | 0.18         |
| Apo 8  | 0.62            | 0.62                | 0.69                 | 0.48            | 0.43            | 0.44       | 0.12        | 0.14         |
| Apo 9  | 0.68            | 0.68                | 0.69                 | 0.52            | 0.44            | 0.55       | 0.13        | 0.12         |
| Apo 10 | 0.51            | 0.51                | 0.53                 | 0.35            | 0.33            | 0.39       | 0.16        | 0.15         |
| Apo 11 | 0.52            | 0.52                | 0.56                 | 0.37            | 0.35            | 0.38       | 0.17        | 0.17         |
| Apo 12 | 0.60            | 0.60                | 0.56                 | 0.41            | 0.39            | 0.39       | 0.12        | 0.13         |
| Apo 13 | 0.64            | 0.64                | 0.62                 | 0.47            | 0.43            | 0.50       | 0.14        | 0.13         |
| Apo 14 | 0.57            | 0.57                | 0.58                 | 0.38            | 0.39            | 0.38       | 0.13        | 0.12         |
| Apo 15 | 0.58            | 0.58                | 0.63                 | 0.45            | 0.39            | 0.49       | 0.17        | 0.15         |
| Apo 16 | 0.65            | 0.65                | 0.70                 | 0.47            | 0.40            | 0.44       | 0.14        | 0.16         |

**Table 3:** Spatial correlation describes the correlation between the log ratio  $M$  of the spot and the median value of  $M$  within a neighborhood defined by a window of 5x5 spots. Note that, to ensure independence,  $M$  of the spot was not included in the median  $M$  of the neighborhood.
